# Supplementary material for: Phosphonated mesoporous silica nanoparticles bearing ruthenium complexes used as molecular probes for tracking oxygen levels in cells and tissues
Source: Royal Society of Chemistry journal article supplement (doi:10.1039/d0ra08771h), 2021-01-01
Supplement: d0ra08771h1.pdf [file d0ra08771h1.pdf]

## Supporting Information

Phosphonated mesoporous silica nanoparticles bearing ruthenium complexes used as  
molecular probe for tracking oxygen levels in cells and tissues

Yui Umehara,<sup>1</sup> Yu Kimura,<sup>1</sup> Freddy Kleitz,<sup>2</sup> Tatsuya Nishihara,<sup>3</sup> Teruyuki Kondo\*<sup>1</sup> and

Kazuhito Tanabe\*<sup>3</sup>

<sup>1</sup>Department of Energy and Hydrocarbon Chemistry, Graduate School of Engineering,  
Kyoto University, Nishikyo-ku, Kyoto, 615-8510, Japan

<sup>2</sup>Department of Inorganic Chemistry – Functional Materials, Faculty of Chemistry,  
University of Vienna, Währinger Straße 42, A-1090, Vienna, Austria

<sup>3</sup>Department of Chemistry and Biological Science, College of Science and Engineering,  
Aoyama Gakuin University, 5-10-1 Fuchinobe, Chuo-ku, Sagamihara, 252-5258, Japan

\*Corresponding author

Dr. Teruyuki Kondo  
Phone: +81-75-383-7055 FAX: +81-75-383-2504  
e-mail: [teruyuki@scl.kyoto-u.ac.jp](mailto:teruyuki@scl.kyoto-u.ac.jp)

Dr. Kazuhito Tanabe  
Phone: +81-42-759-6229 FAX: +81-42-759-6493  
e-mail: [tanabe.kazuhito@chem.aoyama.ac.jp](mailto:tanabe.kazuhito@chem.aoyama.ac.jp)

**Table S1.** Weight Loss of Particles in Each Step in Scheme 1.<sup>a</sup>

|              | pM-Ru-48-100 | pM-Ru-41-100 | pM-Ru-48-50 |
|--------------|--------------|--------------|-------------|
| Particle I   | 45%          | 43%          | 29%         |
| Particle II  | 40%          | 35%          | 28%         |
| Particle III | 11%          | 5.2%         | 8.8%        |
| Particle IV  | 16%          | 15%          | 18%         |

<sup>a</sup>Weight loss was estimated by using thermogravimetric analysis.

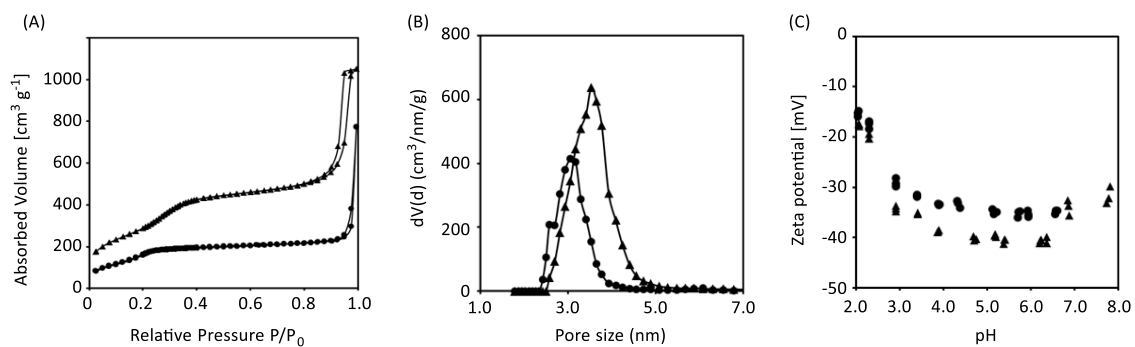

**Figure S1.** (A) N<sub>2</sub> physisorption isotherms of pM-Ru-41-100 (triangle) and pM-Ru-48-50 (circle). The analysis was conducted at  $-196$  °C. (B) Pore size distribution analysis of pM-Ru-41-100 (triangle) and pM-Ru-48-50 (circle). (C) The effect of pH on zeta potentials of pM-Ru-41-100 (triangle) and pM-Ru-48-50 (circle).

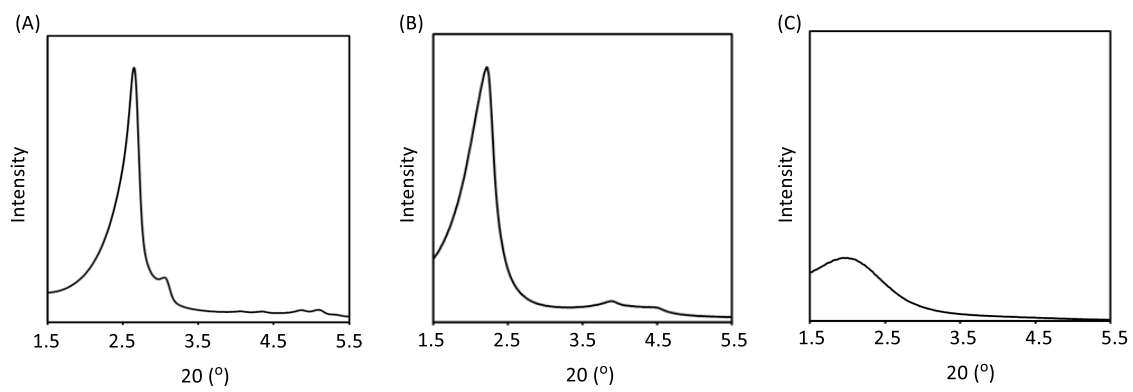

**Figure S2.** XRD patterns of pM-Ru-48-100 (A), pM-Ru-41-100 (B) and pM-Ru-48-50 (C).

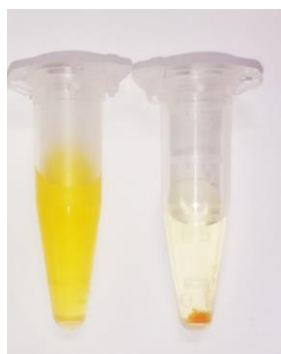

**Figure S3.** Nanoparticles dispersed in aqueous solution containing sodium phosphate buffer (5 mM, pH 7.0). Left: Nanoparticles with phosphonate groups on their external surface (pM-Ru). Right: Nanoparticles without phosphonate groups on their external surface (M-Ru).

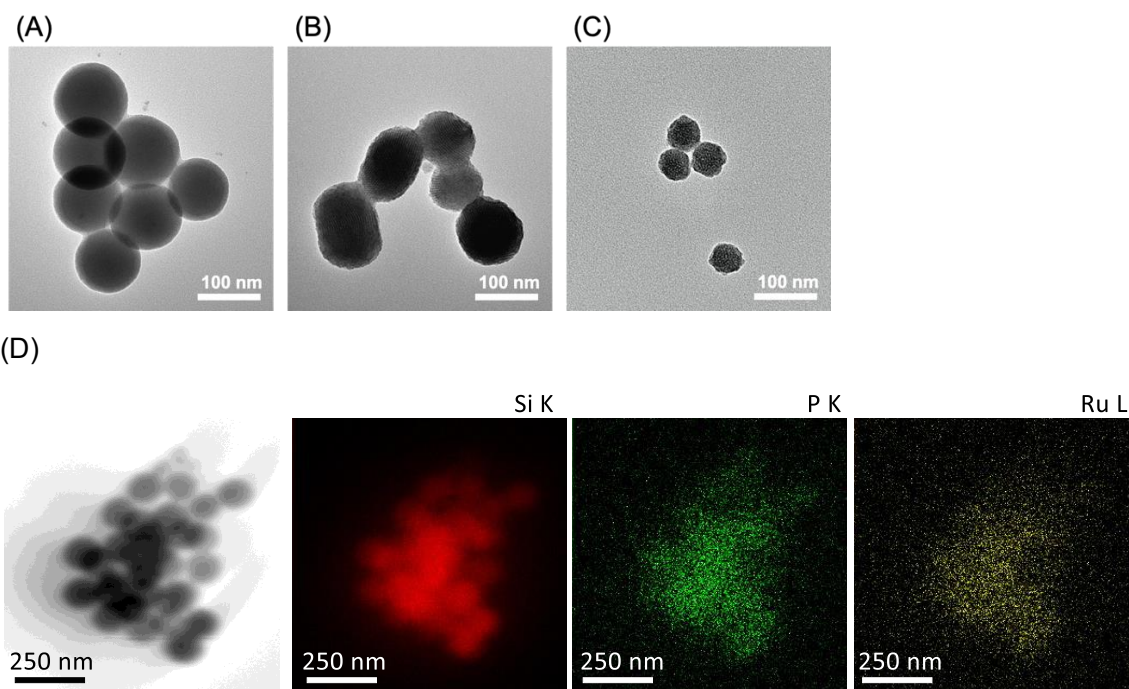

**Figure S4.** TEM images of (A) pM-Ru-48-100, (B) pM-Ru-41-100 and (C) pM-Ru-48-50. (D) EDX images of pM-Ru-48-100.

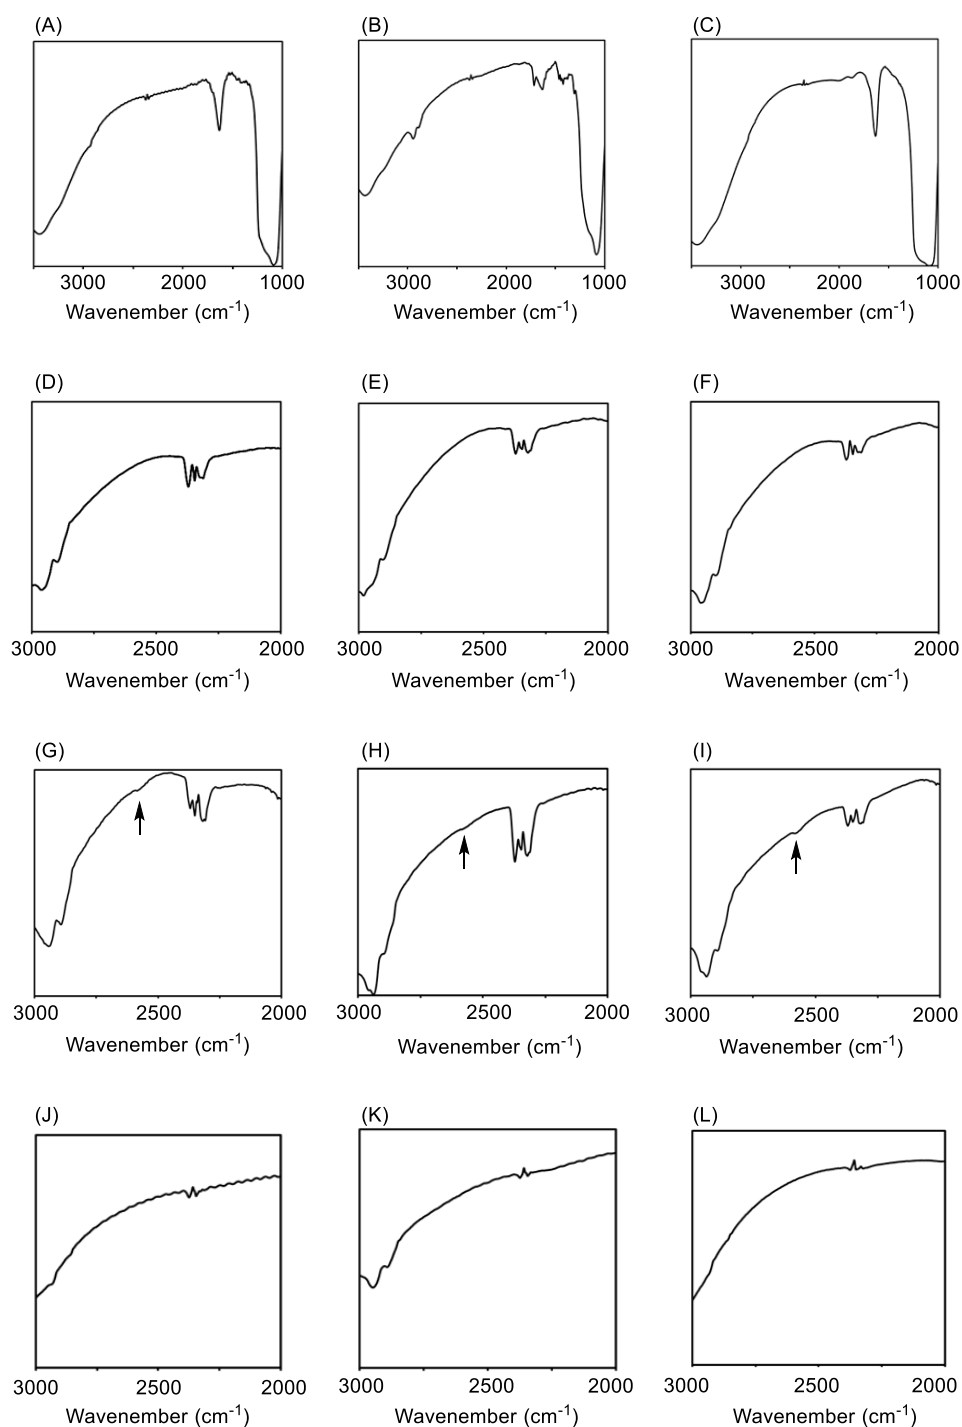

**Figure S5.** IR spectra of pM-Ru-48-100 (A, D, G, J), pM-Ru-41-100 (B, E, H, K) and pM-Ru-48-50 (C, F, I, L). (A-C) IR spectra (1000-3500  $\text{cm}^{-1}$ ) of Particle IV. (D-F) Enlarged view of the spectra (2000-3000  $\text{cm}^{-1}$ ) of Particle II. (G-I) Enlarged view of the spectra (2000-3000  $\text{cm}^{-1}$ ) of Particle III. Arrows indicate the band (2600  $\text{cm}^{-1}$ ) attributed to thiol groups. (J-L) Enlarged view of the spectra (2000-3000  $\text{cm}^{-1}$ ) of Particle IV.

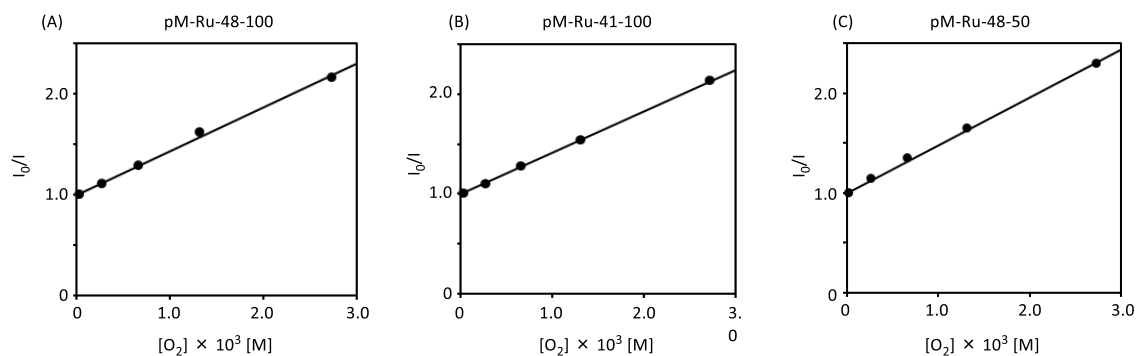

**Figure S6.** Stern–Volmer plot of the relative phosphorescence intensity ( $I_0/I$ ) of pM-Rus in the presence of oxygen as a quencher. The relative emission intensities of pM-Ru-48-100 (A), pM-Ru-41-100 (B) and pM-Ru-48-50 (C) were plotted against the oxygen concentration.



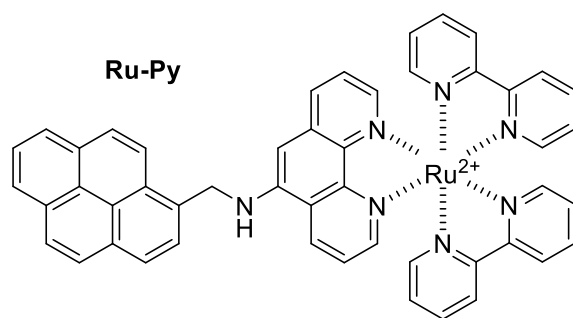

**Figure S7.** Chemical structure of Ru-Py.

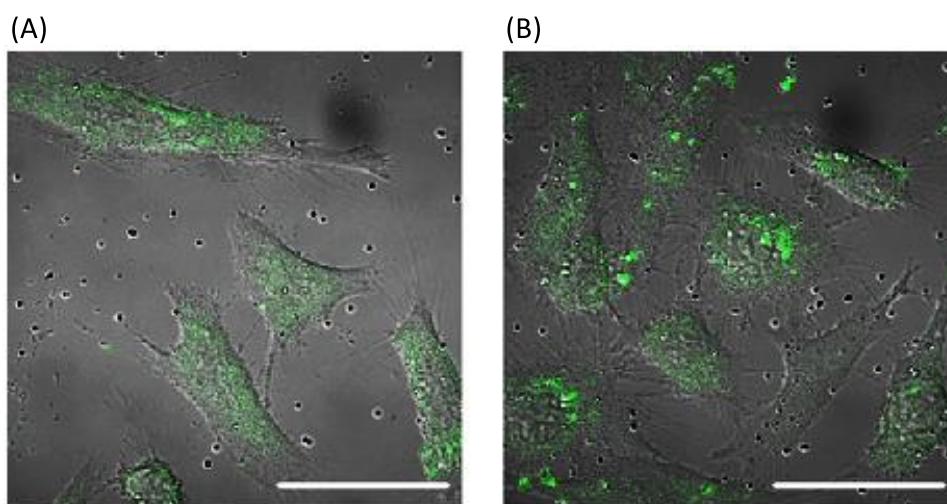

**Figure S8.** Visualization of singlet oxygen generated in HeLa cells by photoirradiation in the presence of pM-Ru-48-100 (A) and pM-Ru-41-100 (B). Scale bar: 50  $\mu\text{m}$ .
